# Supplementary material
Source: ML conference proceedings conference paper supplement (https://openaccess.thecvf.com/content/ICCV_2017/html/Szeto_Click_Here_Human-Localized_ICCV_2017_paper.html)
Supplement: Supplementary file 1 [file Szeto_Click_Here_Human-Localized_ICCV_2017_supplemental.pdf]

Archive with 2 entries (2 files):
- 0862-video-abstract.mp4
- 0862-supp.pdf
