# Supplementary material
Source: ML conference proceedings conference paper supplement (https://openaccess.thecvf.com/content/ICCV_2017/html/Szeto_Click_Here_Human-Localized_ICCV_2017_paper.html)
Supplement: Supplementary file 1 [file Szeto_Click_Here_Human-Localized_ICCV_2017_supplemental.pdf › 0862-supp.pdf]

# Click Here: Human-Localized Keypoints as Guidance for Viewpoint Estimation

## Supplementary Material

Ryan Szeto and Jason J. Corso  
Electrical Engineering and Computer Science  
University of Michigan  
{szetor, jjcorso}@umich.edu

### 1. Introduction

This document constitutes the written portion of the supplementary material for *Click Here: Human-Localized Keypoints as Guidance for Viewpoint Estimation*. It is organized as follows:

- Section 2 provides details for our CH-CNN architecture, including layer sizes and training parameters.
- Section 3 describes how we collected and verified the CAD model keypoint annotations in our dataset.
- Section 4 provides additional quantitative analysis. We analyze the  $Acc_{\pi/6}$  and  $MedErr$  evaluation metrics on our model and R4CNN [6] in multiple ways, such as comparing performance by keypoint class and comparing accuracy over a range of thresholds. Additionally, we list the evaluation metrics on variations of our model that use different types of keypoint maps.
- Section 5 provides additional qualitative results. First, we visualize challenging instances in which occlusion, truncation, and/or symmetry occur. Then, we visualize the weight maps produced by instances from each object class.

### 2. CH-CNN Architecture and Training Details

CH-CNN takes three inputs that are generated from instance tuple  $(I, x, y, c_{kp}, c_o)$ :  $I$ ,  $m_{kp}$ , and  $v_{kp}$ .  $I$  is a  $227 \times 227 \times 3$  RGB image subtracted by the ImageNet image mean [2];  $m_{kp}$  is a  $227 \times 227$  grayscale image whose values are produced by any method described in Section 4; and  $v_{kp}$  is a 34-length vector (corresponding to 12 bus, 12 car, and 10 motorcycle keypoint classes) with value 1 at keypoint class index  $c_{kp}$  and zero elsewhere. The image stream of CH-CNN is implemented with the first seven layers from AlexNet [5] using the reference architecture available in Caffe [3].

To obtain  $a_m$ , the keypoint map is first downsampled with a max pooling layer with a stride and kernel size of 5. Then, the result is flattened and multiplied by the learned  $2116 \times 2116$  matrix  $W_m$ . To obtain  $a_{c_{kp}}$ , the one-hot keypoint class vector  $v_{kp}$  is multiplied by the learned  $34 \times 34$  matrix  $W_{c_{kp}}$ . The concatenated vector  $[a_m^\top a_{c_{kp}}^\top]^\top$  is multiplied by the learned  $169 \times 2150$  weight matrix  $W_{kpc}$  to get  $a_{kpc}$ , to which a softmax and reshaping is applied to obtain a  $13 \times 13$  weight map whose entries sum to 1 ( $13 \times 13$  comes from the height and width of the conv4 activation tensor, and 169 comes from their product). For the inference layers, the hidden activations  $a_{im,kp}$  are obtained with a learned non-linear fully-connected layer with 4096 outputs and ReLU as the non-linear activation function. Finally, the angle prediction layer for each angle  $\theta_j$  and object class  $c_o$  takes  $a_{im,kp}$  and multiplies it by the learned  $360 \times 4096$  matrix  $W_{\theta_j, c_o}$ .

The entire CH-CNN architecture is trained end-to-end with the Adam algorithm [4] while training on synthetic and real instances. In both cases, the batch size, base learning rate, first momentum rate, and second momentum rate are set to 192,  $10^{-4}$ , 0.9, and 0.999 respectively. It takes about 3 days on an NVIDIA Titan X Pascal GPU to train CH-CNN.

### 3. Keypoint Annotation Collection Details

Collecting a large number of keypoint annotations efficiently requires a scalable and easily-accessible interface. To this end, we extended the open-source project *cad.js*<sup>1</sup>, a web-based interface and server for viewing 3D CAD models, to support

<sup>1</sup><https://github.com/ghemingway/cad.js>

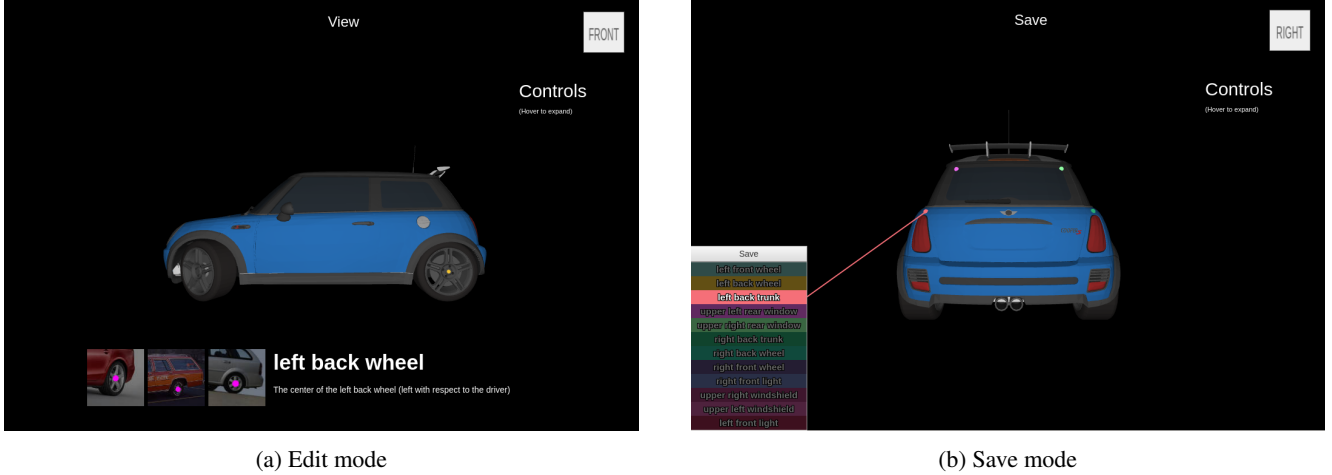

Figure 1: Screenshots of our CAD model annotation interface. Figure best viewed zoomed-in on a monitor.

keypoint annotation. Figure 1 shows screenshots of our keypoint annotation interface. When a CAD model is loaded, the user can navigate around the object via rotate, pan, and zoom operations with the mouse. At the bottom of the screen is a panel that describes the requested keypoint with visual examples and text. In order to label the keypoint, the user enters *edit mode* and drags a small sphere onto the appropriate location. The user cycles through and labels all keypoints for the model’s object class, then enters *save mode* to preview the annotations before saving them to the server. The preview displays all keypoints at once, with a line drawn from the textual label to the keypoint location; users can view individual keypoints by mousing over the textual label.

To obtain the 3D CAD models, we downloaded the bus, car, and motorcycle models from ShapeNet [1]. We restricted ourselves to these three vehicle classes from PASCAL 3D+ due to cost constraints; however, we note that our methods extend naturally to any number of object classes. After filtering out models that did not capture realistic appearance (e.g. models without wheels, cars without bodies, etc.), which comprised about 1.8% of ShapeNet vehicle models, we were left with 918 bus, 7,377 car, and 320 motorcycle models to annotate.

We hired 10 student annotators over the course of one month to label the 3D CAD models with the semantic keypoints identified in the PASCAL 3D+ dataset [7]. Although Xiang et al. [7] identified keypoints meant to broadly describe the corresponding object classes, we found that not all CAD models contained all semantic keypoints (e.g. convertible cars do not have rear windows, so the “rear windshield corner” keypoints have no meaning for these models). In these cases, the annotators were instructed to not label those keypoints; as a result, some CAD models do not have an annotation for every keypoint for their object class.

To improve the quality and consistency of annotations, each CAD model was viewed by one annotator and one verifier—the annotator placed the labels, and the verifier checked that the labels were placed appropriately. The verifier sent the model back to the annotator if he/she disagreed with the locations; if they could not reach a mutual agreement on keypoint locations, we annotated the model ourselves.

## 4. Additional Quantitative Results

We begin by exploring the impact of using four different types of keypoint maps  $m_{kp}$  on viewpoint estimation performance for CH-CNN. We produce unnormalized keypoint maps  $\widehat{m}_{kp}$  defined by the following four procedures:

- **Gaussian keypoint map.** Given keypoint location  $(x, y)$ , the unnormalized keypoint map  $\widehat{m}_{kp}$  is given by a 2D Gaussian whose mean is  $[x, y]^\top$  and whose standard deviation is about 10% of the image (23 pixels for our  $227 \times 227$  images).
- **Euclidean distance transform keypoint map.** Given keypoint location  $(x, y)$ , each entry in the keypoint map  $m_{kp}^{(i,j)}$  is given as

$$m_{kp}^{(i,j)} = \sqrt{(i - x)^2 + (j - y)^2} .$$

|                    | $Acc_{\pi/6}$ |             |             |             | $MedErr$    |             |             |             |
|--------------------|---------------|-------------|-------------|-------------|-------------|-------------|-------------|-------------|
|                    | bus           | car         | motor       | <i>mean</i> | bus         | car         | motor       | <i>mean</i> |
| CH-CNN (Gaussian)  | 88.9          | 82.2        | 82.1        | 84.4        | 2.92        | 6.05        | 11.5        | 6.81        |
| CH-CNN (Euclidean) | 94.5          | 89.6        | 84.9        | 89.7        | 2.93        | 5.00        | <b>11.0</b> | <b>6.31</b> |
| CH-CNN (Manhattan) | 95.4          | <b>90.8</b> | 83.1        | 89.8        | 2.99        | <b>4.97</b> | 11.5        | 6.50        |
| CH-CNN (Chebyshev) | <b>96.8</b>   | 90.2        | <b>85.2</b> | <b>90.7</b> | <b>2.64</b> | 4.98        | 11.4        | 6.35        |

Table 1: PASCAL 3D+ performance for our CH-CNN model with different keypoint maps. *CH-CNN (Gaussian)* refers to our model using a Gaussian centered around the keypoint location as the keypoint map. The remaining three rows correspond to our model using distance transform keypoint maps with Euclidean, Manhattan, and Chebyshev distance respectively. The best performance in each column (highest value for  $Acc_{\pi/6}$ , lowest value for  $MedErr$ ) is bolded.

- **Manhattan distance transform keypoint map.** Given keypoint location  $(x, y)$ , each entry in the keypoint map  $m_{kp}^{(i,j)}$  is given as

$$m_{kp}^{(i,j)} = |i - x| + |j - y| .$$

- **Chebyshev distance transform keypoint map.** Given keypoint location  $(x, y)$ , each entry in the keypoint map  $m_{kp}^{(i,j)}$  is given as

$$m_{kp}^{(i,j)} = \max(|i - x|, |j - y|) .$$

We produce the final keypoint map  $m_{kp}$  from an unnormalized keypoint map  $\widehat{m}_{kp}$  by dividing  $\widehat{m}_{kp}$  by the maximum possible value over all possible  $\widehat{m}_{kp}$  (note that this is not necessarily the maximum value of the given  $\widehat{m}_{kp}$ ). The performance of CH-CNN with each type of keypoint map is shown in Table 1.

Table 2 lists the performance of fine-tuned R4CNN [6] and CH-CNN on each keypoint type, as well as the relative improvement of our model over fine-tuned R4CNN. From the overall relative improvement for all three object classes under both evaluation metrics, we observe that providing keypoint information generally increases viewpoint estimation performance over R4CNN. However, we also note that in the motorcycle class, some keypoint classes appear to confuse CH-CNN and yield a relative decrease in performance.

In Table 3, we compare the errors made by CH-CNN and R4CNN based on per-instance performance rather than aggregate performance. To do this, we compute the error  $\Delta(R_{pr}, R_{gt})$  for one instance from R4CNN, and subtract the corresponding value from CH-CNN. The values in Table 3 are the means of the resulting difference in errors stratified by keypoint class. From this table, we see that across most keypoint classes, CH-CNN predicts an angle closer to the ground truth than R4CNN for any particular instance. We see the same general trends as those seen in Table 2, such as performance varying depending on keypoint class and decreased performance for certain motorcycle keypoint classes.

In Figure 2, we plot the value of  $Acc_{Thresh}$ , defined as the fraction of test instances where  $\Delta(R_{pr}, R_{gt}) < Thresh$  in radians, across multiple values of  $Thresh$  between 0 and  $\pi/4$ . We also report the normalized area under the curve (nAUC), which is the percentage of the plotted area that falls under a given curve. From this graph, we notice that the gap in performance between CH-CNN and R4CNN widens considerably with a large enough threshold. However, performance between the two models is similar at very small values of  $Thresh$ , which suggests the need to focus on improvements at strict threshold values.

## 5. Additional Qualitative Results

In this section, we present additional qualitative results. Figure 3 visualizes additional instances where a high degree of occlusion, truncation, or object symmetry is present. Figure 4 shows the attention maps  $\mathcal{W}_{conv4}$  that are generated from a test instance from each object class.

| Keypoint                 | $Acc_{\pi/6}$ |              |              | $MedErr$    |             |              |
|--------------------------|---------------|--------------|--------------|-------------|-------------|--------------|
|                          | R4CNN f.t.    | CH-CNN       | % $\uparrow$ | R4CNN f.t.  | CH-CNN      | % $\uparrow$ |
| Back left lower corner   | 86.0          | 94.6         | 10.0         | 2.93        | <b>2.34</b> | 20.1         |
| Back left upper corner   | <i>81.0</i>   | <i>91.4</i>  | 12.8         | 3.87        | 2.99        | <b>22.7</b>  |
| Back right lower corner  | 86.7          | 93.9         | 8.30         | 3.32        | 2.92        | 12.1         |
| Back right upper corner  | 80.9          | 93.0         | <b>15.0</b>  | 3.66        | <i>3.01</i> | 17.8         |
| Front left lower corner  | <b>94.8</b>   | 97.4         | 2.74         | <b>2.64</b> | 2.55        | 3.41         |
| Front left upper corner  | 93.3          | 97.1         | 4.07         | 2.66        | 2.61        | <i>1.88</i>  |
| Front right lower corner | 94.4          | 98.0         | 3.81         | 2.83        | 2.55        | 9.89         |
| Front right upper corner | 88.2          | 98.6         | 11.8         | 2.83        | 2.66        | 6.01         |
| Left back wheel          | 93.1          | 97.1         | 4.3          | 2.80        | 2.45        | 12.5         |
| Left front wheel         | 90.6          | <b>100.0</b> | 10.4         | 3.12        | 2.92        | 6.41         |
| Right back wheel         | 96.2          | 98.7         | <i>2.60</i>  | 3.09        | 2.66        | 13.9         |
| Right front wheel        | 91.5          | <b>100.0</b> | 9.29         | 3.08        | 2.99        | 2.92         |
| <i>Overall</i>           | 90.7          | 96.8         | 6.73         | 2.93        | 2.64        | 9.90         |

(a) Bus

| Keypoint               | $Acc_{\pi/6}$ |             |              | $MedErr$    |             |              |
|------------------------|---------------|-------------|--------------|-------------|-------------|--------------|
|                        | R4CNN f.t.    | CH-CNN      | % $\uparrow$ | R4CNN f.t.  | CH-CNN      | % $\uparrow$ |
| Left front wheel       | 86.9          | 89.5        | 2.99         | 5.63        | 5.33        | 5.33         |
| Left back wheel        | 80.6          | 89.0        | 10.4         | 5.81        | <i>5.70</i> | 1.89         |
| Right front wheel      | 89.4          | 91.2        | 2.01         | 5.73        | <i>5.70</i> | <i>0.52</i>  |
| Right back wheel       | 85.9          | 90.8        | 5.70         | 5.84        | <i>5.70</i> | 2.40         |
| Left front light       | 90.5          | 94.5        | 4.42         | 4.53        | <b>4.24</b> | 6.40         |
| Right front light      | <b>93.2</b>   | <b>95.5</b> | <i>2.47</i>  | <b>4.50</b> | 4.27        | 5.11         |
| Left front windshield  | 87.3          | 91.0        | 4.24         | 5.39        | 4.78        | 11.3         |
| Right front windshield | 88.9          | 91.7        | 3.15         | 5.00        | 4.62        | 7.60         |
| Left back trunk        | 76.8          | 89.5        | 16.5         | 5.87        | 4.70        | 19.9         |
| Right back trunk       | 72.8          | 88.0        | 20.9         | 5.91        | 4.99        | 15.6         |
| Left back windshield   | 72.1          | 84.7        | 17.5         | 7.22        | 5.18        | 28.3         |
| Right back windshield  | 70.8          | 87.6        | <b>23.7</b>  | <i>7.61</i> | 5.34        | <b>29.8</b>  |
| <i>Overall</i>         | 78.5          | 90.2        | 14.9         | 5.63        | 4.98        | 11.6         |

(b) Car

| Keypoint                | $Acc_{\pi/6}$ |             |              | $MedErr$    |             |              |
|-------------------------|---------------|-------------|--------------|-------------|-------------|--------------|
|                         | R4CNN f.t.    | CH-CNN      | % $\uparrow$ | R4CNN f.t.  | CH-CNN      | % $\uparrow$ |
| Seat back               | 84.2          | 84.7        | 0.59         | 12.6        | 12.5        | 0.79         |
| Seat front              | 84.3          | 82.6        | <i>-2.02</i> | 12.4        | <i>13.7</i> | <i>-10.5</i> |
| Head center             | 80.8          | 81.3        | 0.62         | 13.1        | 12.7        | 3.05         |
| Headlight center        | 90.5          | 90.5        | 0.00         | 10.8        | 10.4        | 3.70         |
| Back wheel, left side   | 77.5          | 86.5        | 11.6         | 12.3        | 12.3        | 0.00         |
| Front wheel, left side  | <b>91.1</b>   | <b>91.9</b> | 0.88         | <b>9.46</b> | <b>9.30</b> | 1.69         |
| Left handle end         | 81.8          | <i>80.3</i> | -1.83        | 11.5        | 11.7        | -1.74        |
| Back wheel, right side  | <i>71.3</i>   | 80.2        | <b>12.5</b>  | <i>14.7</i> | 12.6        | <b>14.3</b>  |
| Front wheel, right side | 87.4          | 91.6        | 4.81         | 11.5        | 10.2        | 11.3         |
| Right handle end        | 84.6          | 83.7        | -1.06        | 11.5        | 11.2        | 2.61         |
| <i>Overall</i>          | 84.1          | 85.2        | 1.40         | 11.7        | 11.4        | 2.56         |

(c) Motorcycle

Table 2: Comparison of fine-tuned R4CNN [6] and CH-CNN performance stratified by keypoint class. The %  $\uparrow$  column lists relative increase in performance of CH-CNN over R4CNN. The worst value in each column (lowest for  $Acc_{\pi/6}$  and %  $\uparrow$ , highest for  $MedErr$ ) is italicized, and the best value (highest for  $Acc_{\pi/6}$  and %  $\uparrow$ , lowest for  $MedErr$ ) is bolded.

## References

- [1] A. X. Chang, T. Funkhouser, L. Guibas, P. Hanrahan, Q. Huang, Z. Li, S. Savarese, M. Savva, S. Song, H. Su, and others. Shapenet: An information-rich 3d model repository. *arXiv preprint arXiv:1512.03012*, 2015. 2

| Keypoint                 | Mean difference |
|--------------------------|-----------------|
| Back left lower corner   | 0.1590          |
| Back left upper corner   | 0.1987          |
| Back right lower corner  | 0.1418          |
| Back right upper corner  | 0.2324          |
| Front left lower corner  | 0.0478          |
| Front left upper corner  | 0.0713          |
| Front right lower corner | 0.0675          |
| Front right upper corner | 0.0966          |
| Left back wheel          | 0.1401          |
| Left front wheel         | 0.1871          |
| Right back wheel         | 0.0540          |
| Right front wheel        | 0.1665          |
| <i>Overall</i>           | 0.1140          |

(a) Bus

| Keypoint               | Mean difference |
|------------------------|-----------------|
| Left front wheel       | 0.0701          |
| Left back wheel        | 0.1389          |
| Right front wheel      | 0.0306          |
| Right back wheel       | 0.0777          |
| Left front light       | 0.0862          |
| Right front light      | 0.0625          |
| Left front windshield  | 0.0715          |
| Right front windshield | 0.0467          |
| Left back trunk        | 0.2601          |
| Right back trunk       | 0.2949          |
| Left back windshield   | 0.2681          |
| Right back windshield  | 0.3110          |
| <i>Overall</i>         | 0.1532          |

(b) Car

| Keypoint                | Mean difference |
|-------------------------|-----------------|
| Seat back               | 0.0062          |
| Seat front              | -0.0091         |
| Head center             | 0.0151          |
| Headlight center        | 0.0223          |
| Back wheel, left side   | 0.1653          |
| Front wheel, left side  | 0.0187          |
| Left handle end         | -0.0353         |
| Back wheel, right side  | 0.1739          |
| Front wheel, right side | 0.0660          |
| Right handle end        | -0.0268         |
| <i>Overall</i>          | 0.0240          |

(c) Motorcycle

Table 3: Mean difference in absolute error for individual instances (R4CNN - CH-CNN) stratified by keypoint class.

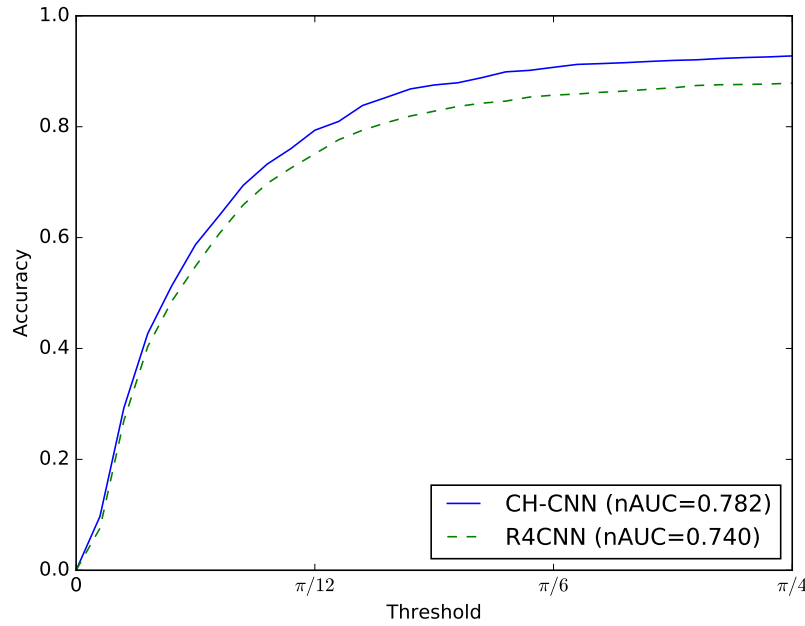Figure 2: The metric  $Acc_{Thresh}$  of R4CNN and CH-CNN for values of  $Thresh$  from 0 to  $\pi/4$ . For a given curve,  $nAUC$  is the area under the curve divided by the total plotted area ( $\pi/4$  in this graph).

- [2] J. Deng, W. Dong, R. Socher, L.-J. Li, K. Li, and L. Fei-Fei. Imagenet: A large-scale hierarchical image database. In *IEEE Conference on Computer Vision and Pattern Recognition*. 1
- [3] Y. Jia, E. Shelhamer, J. Donahue, S. Karayev, J. Long, R. Girshick, S. Guadarrama, and T. Darrell. Caffe: Convolutional Architecture for Fast Feature Embedding. *arXiv preprint arXiv:1408.5093*, 2014. 1
- [4] D. Kingma and J. Ba. Adam: A method for stochastic optimization. *arXiv preprint arXiv:1412.6980*, 2014. 1
- [5] A. Krizhevsky, I. Sutskever, and G. E. Hinton. Imagenet classification with deep convolutional neural networks. In *Advances in Neural Information Processing Systems*, 2012. 1
- [6] H. Su, C. R. Qi, Y. Li, and L. J. Guibas. Render for CNN: Viewpoint Estimation in Images Using CNNs Trained with Rendered 3d Model Views. In *IEEE International Conference on Computer Vision*, 2015. 1, 3, 4, 6
- [7] Y. Xiang, R. Mottaghi, and S. Savarese. Beyond pascal: A benchmark for 3d object detection in the wild. In *IEEE Winter Conference on Applications of Computer Vision*. IEEE, 2014. 2

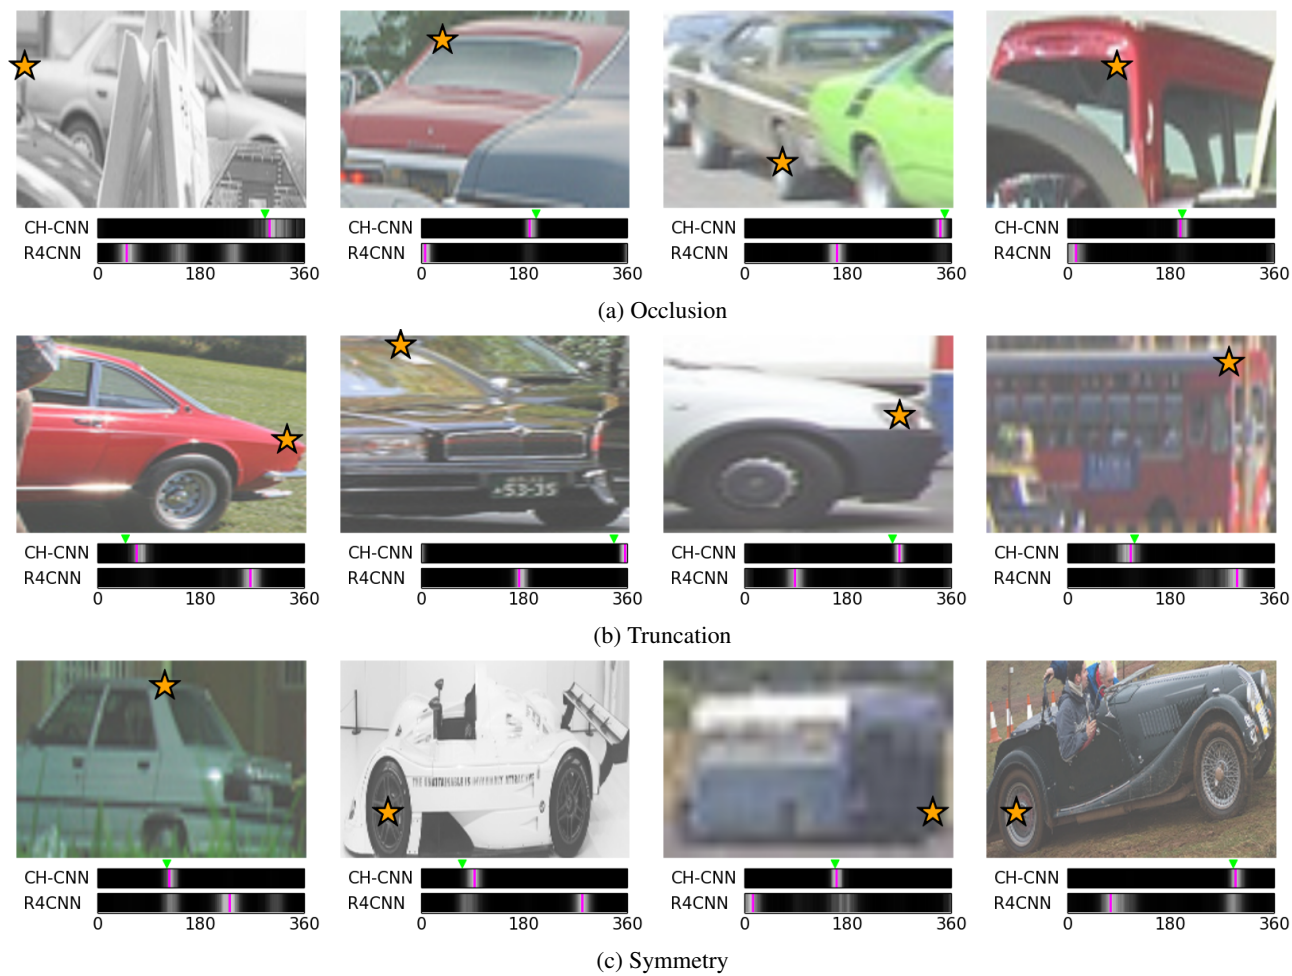

Figure 3: Qualitative comparison of R4CNN [6] and CH-CNN on additional challenging instances.

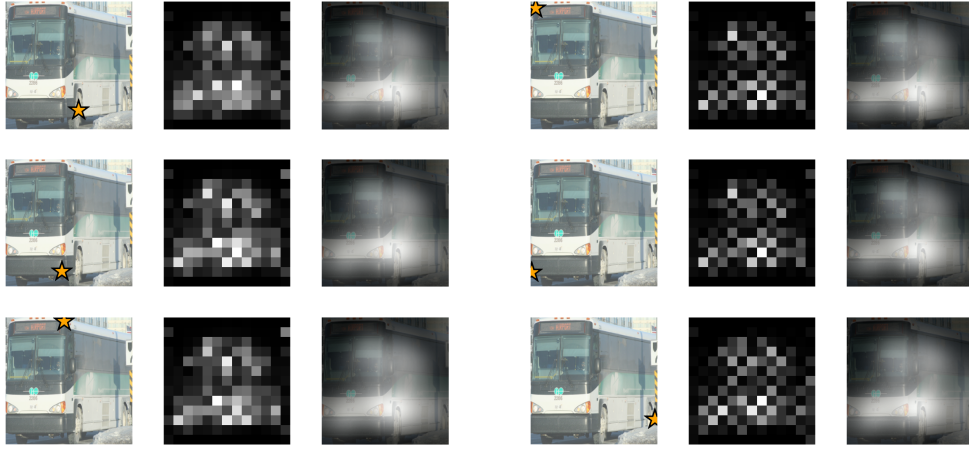

(a) Bus

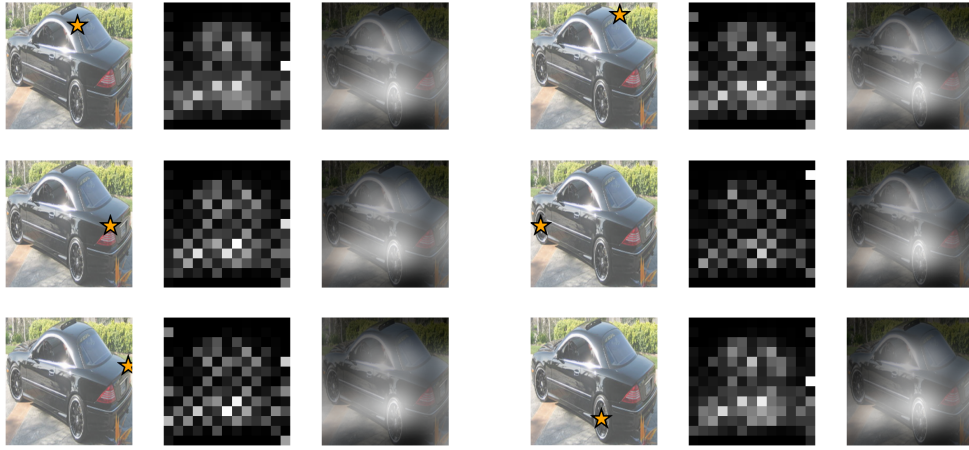

(b) Car

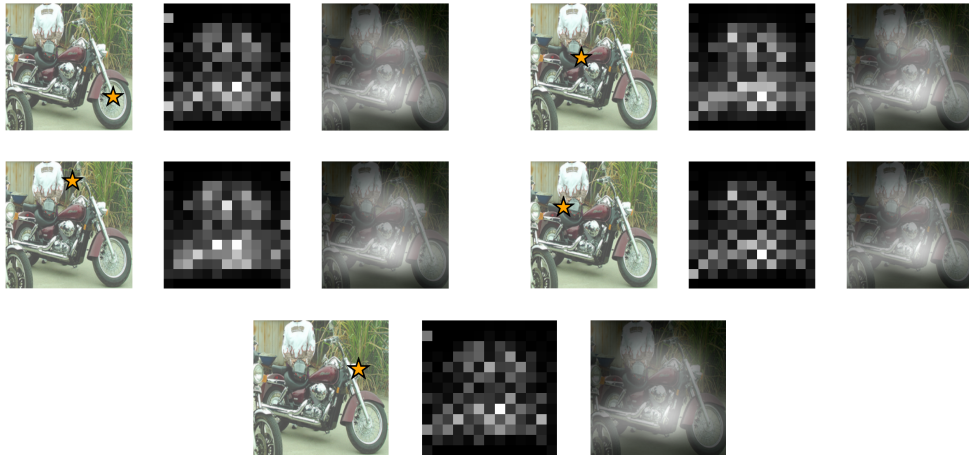

(c) Motorcycle

Figure 4: The weight maps visualized on test instances from each object class. In each cell, the real image and keypoint visualization is on the left, the learned weight map is in the middle, and a visualization of the weight map overlaid on the image is on the right. The overlay is generated by upsampling the weight map to the original image resolution and applying a Gaussian filter to the result. The light masks and orange stars are for visualizing the keypoint location in this figure only, and are not part of the input to any network.
